# Supplementary material
Source: PubMed Central journal article supplement (PMC4037152)

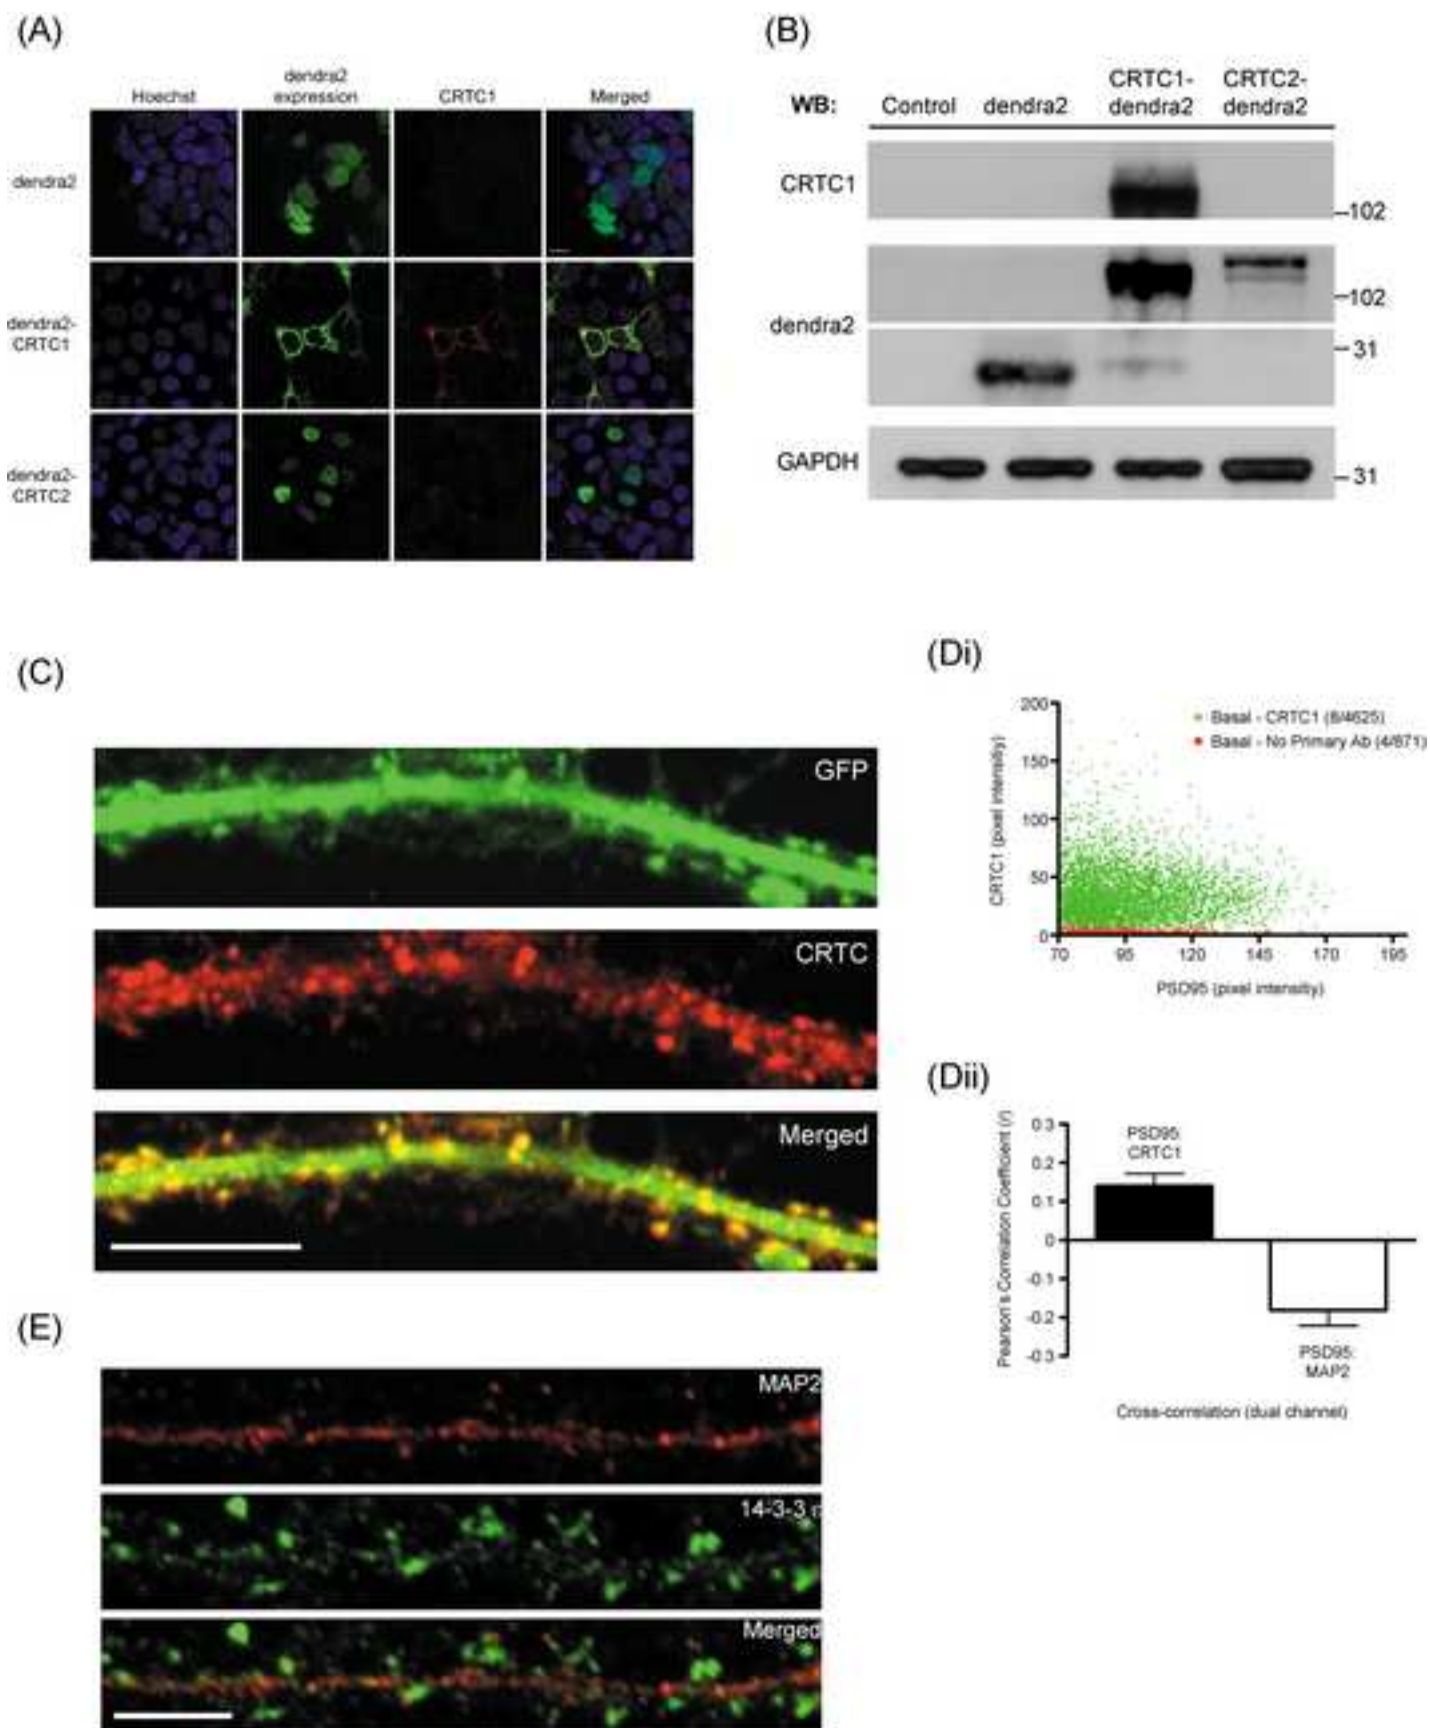

Figure S1

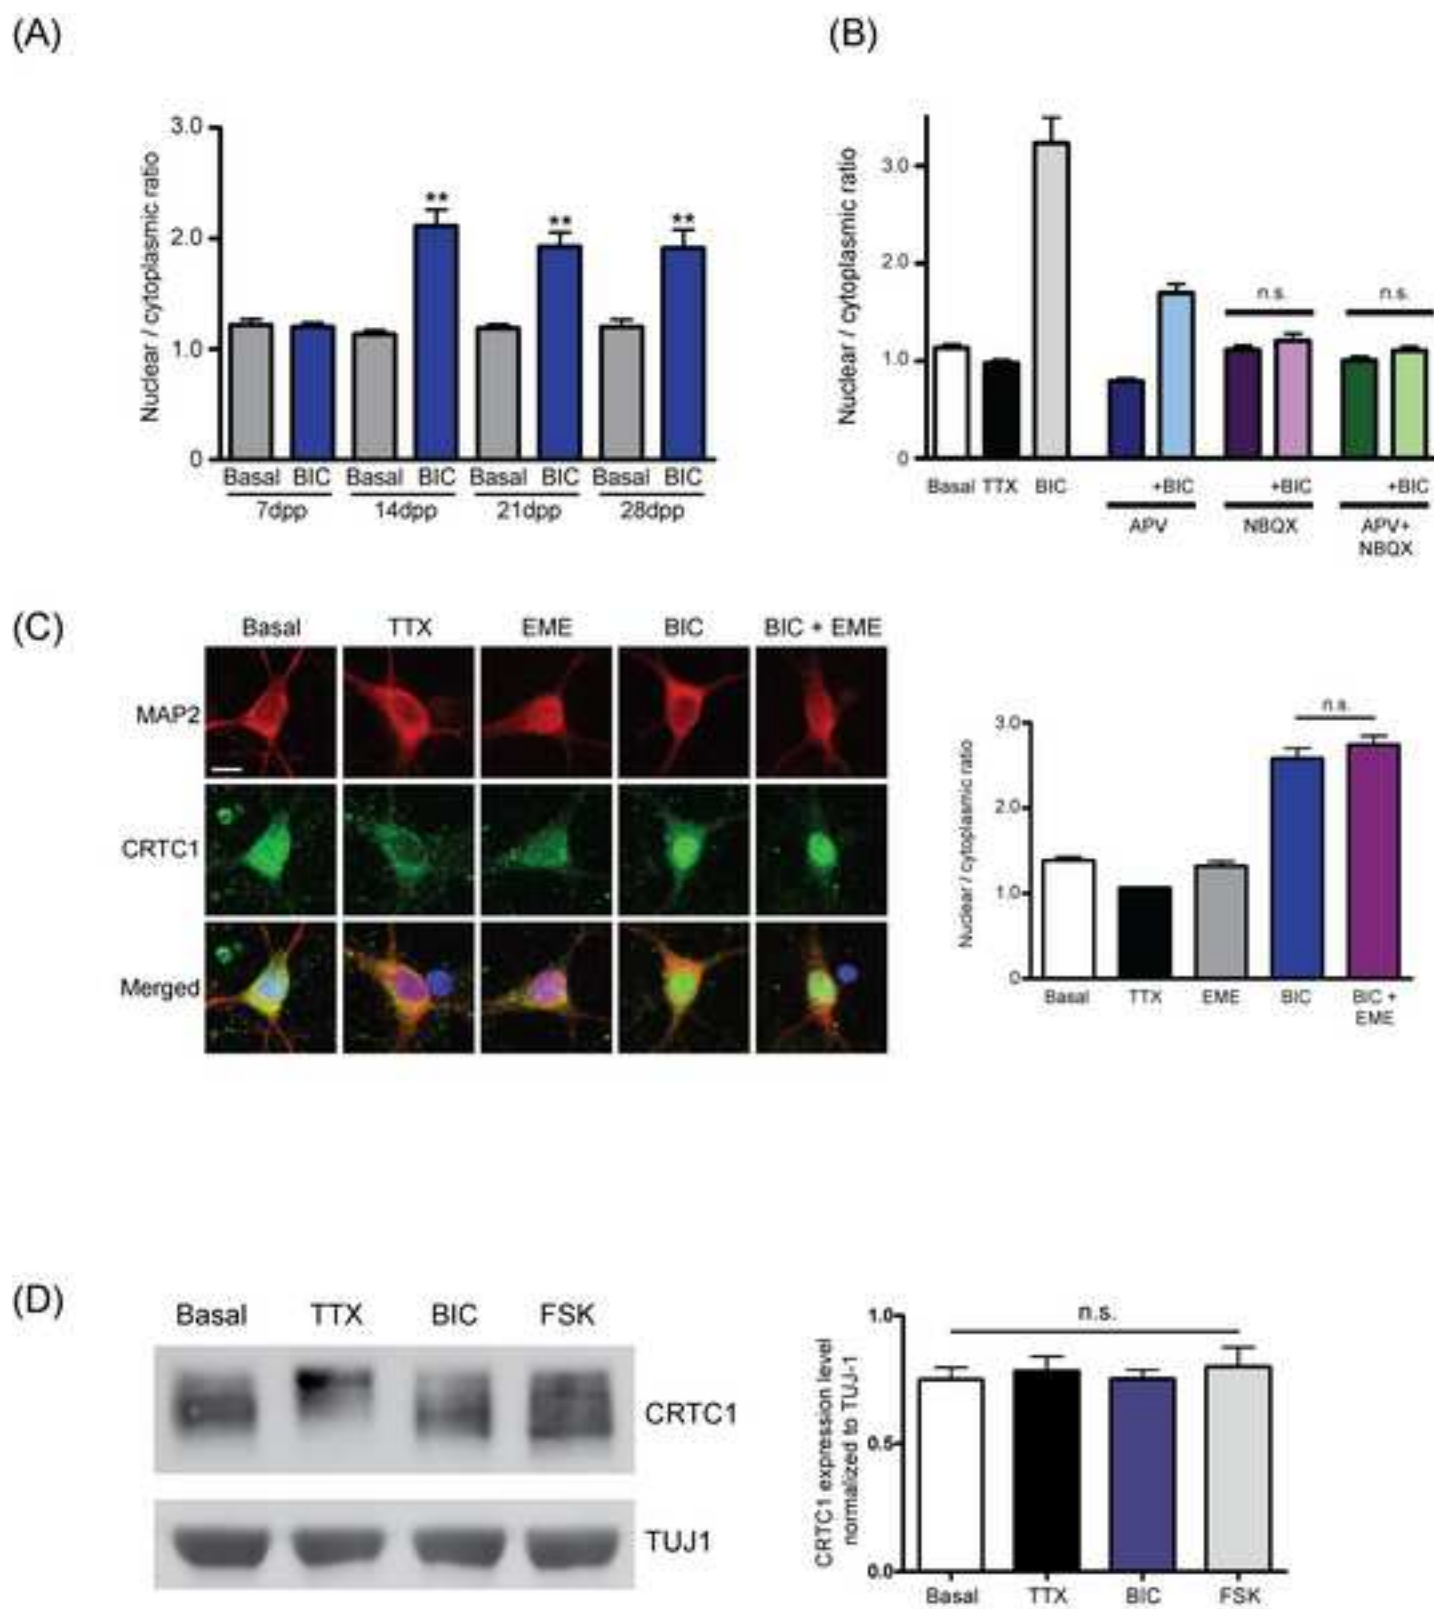

Figure S2

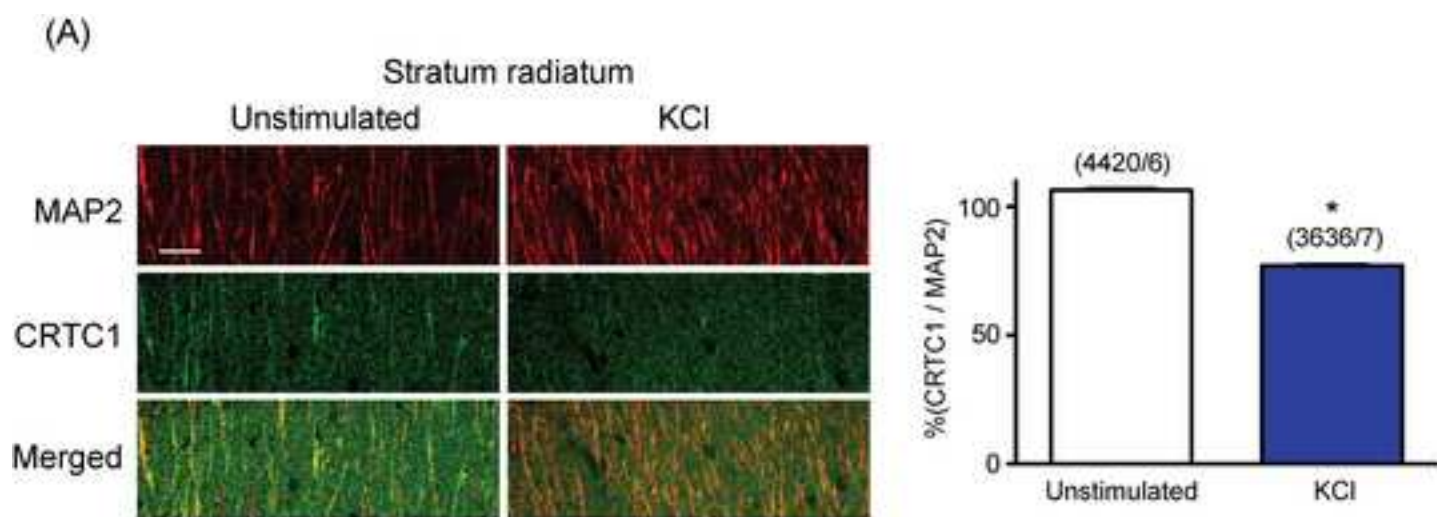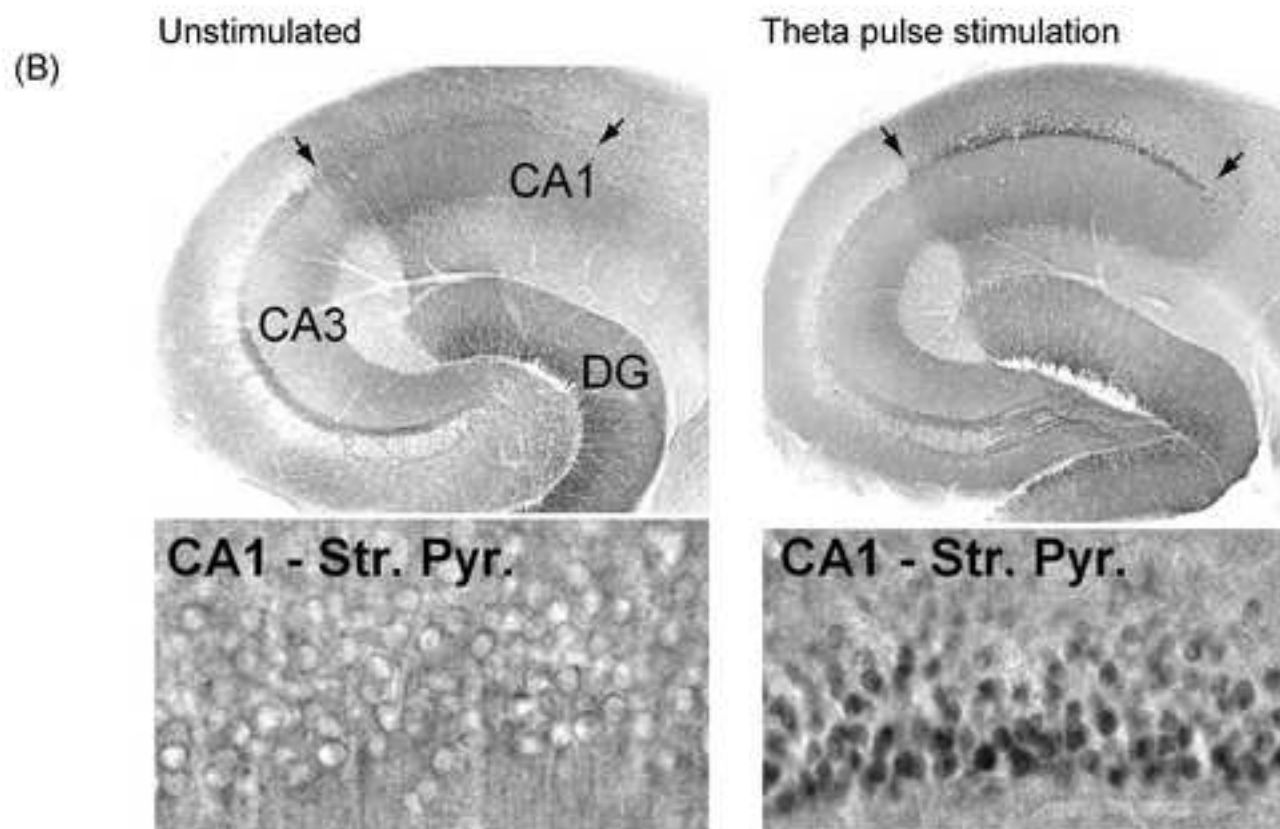

Figure S3

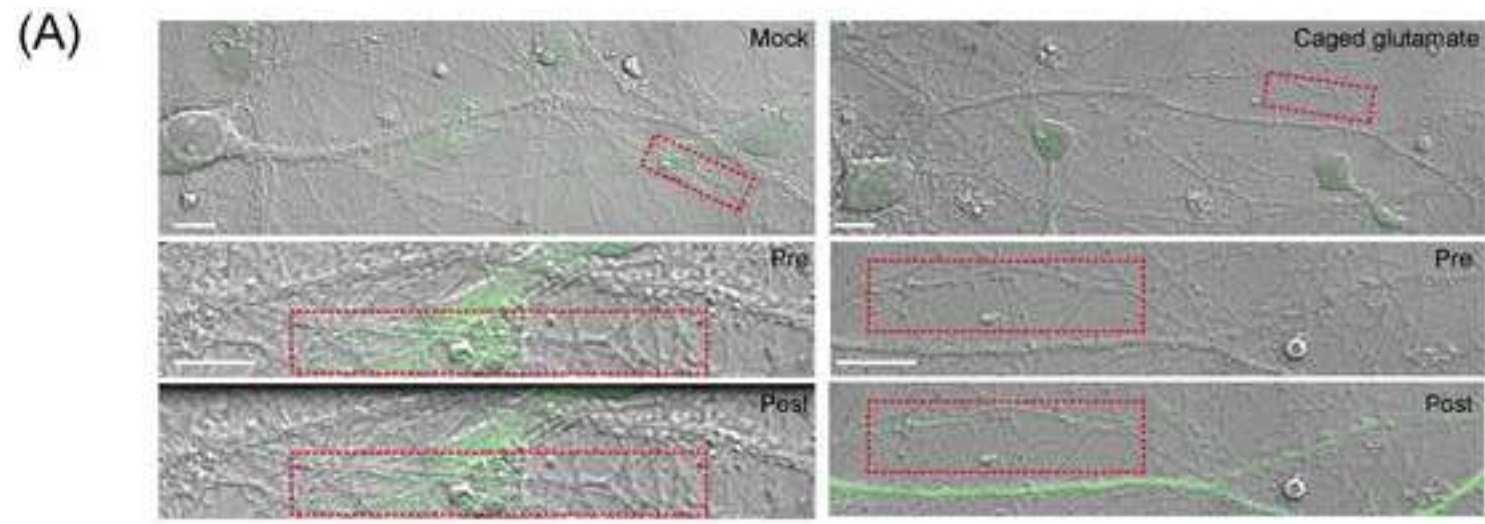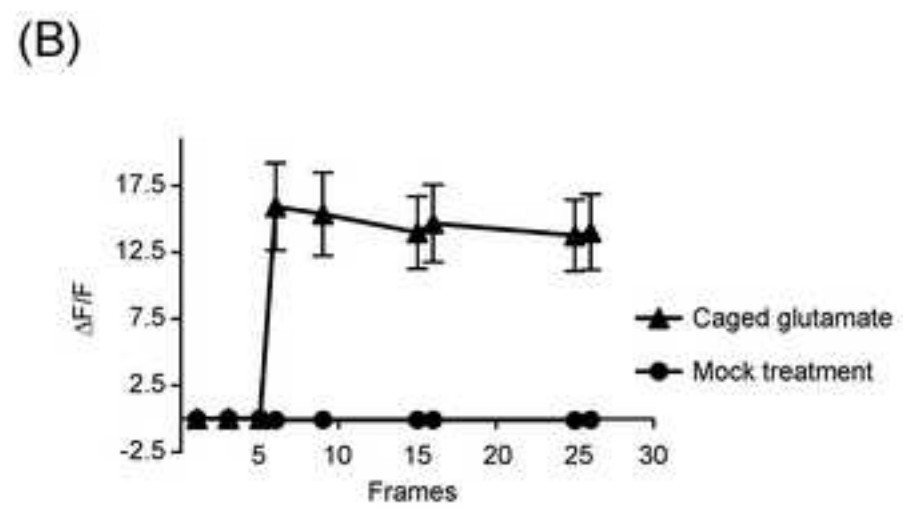

Figure S4



(A)

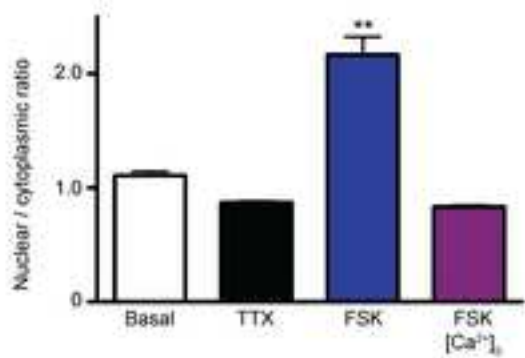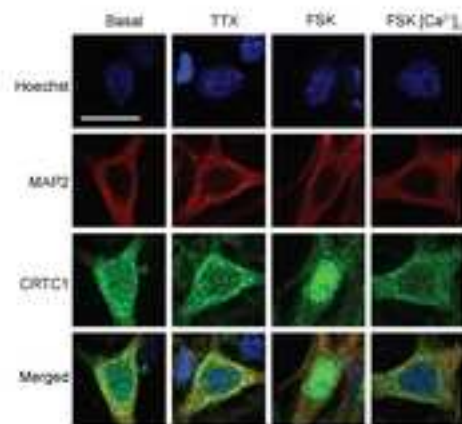

(B)

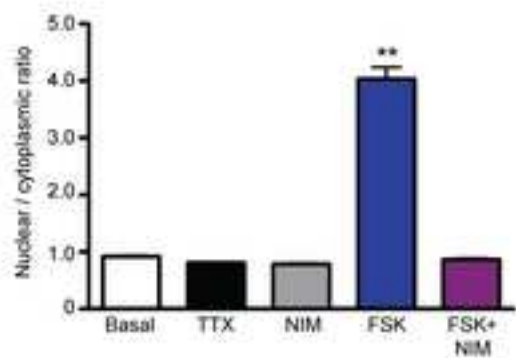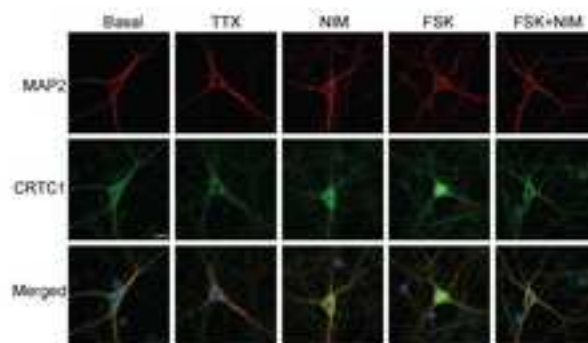

(C)

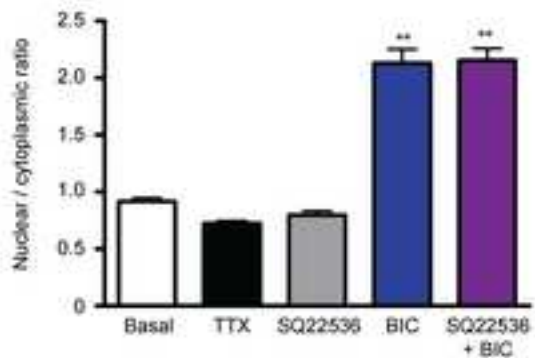

(D)

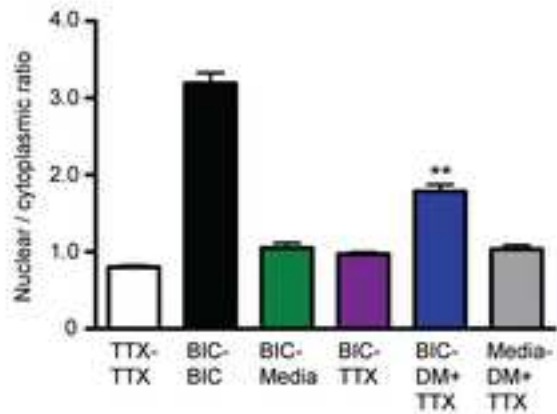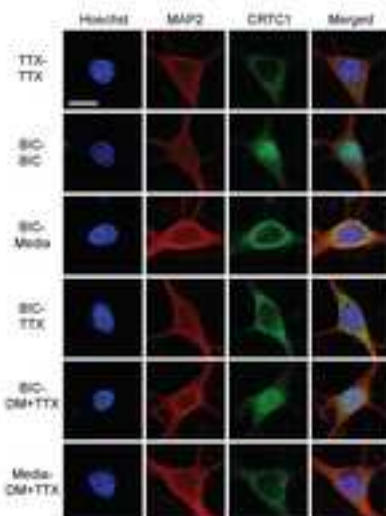

Figure S5

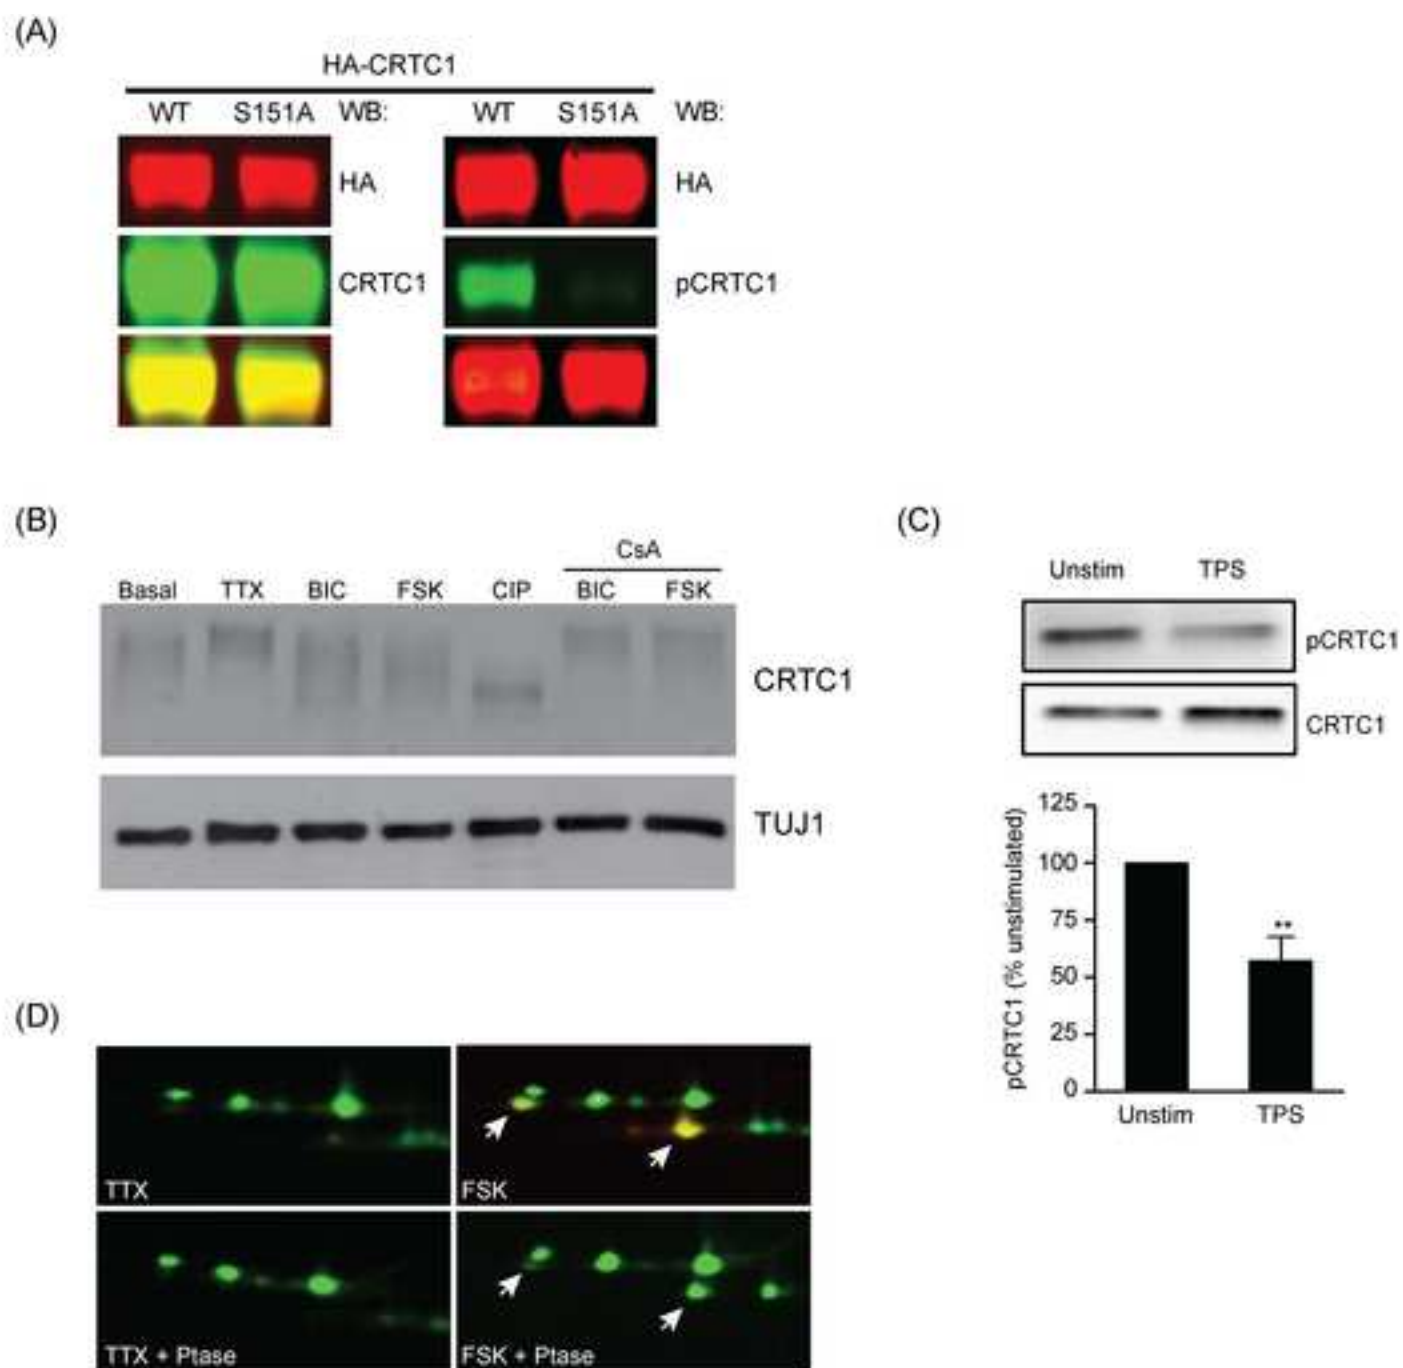

Figure S6

(A)

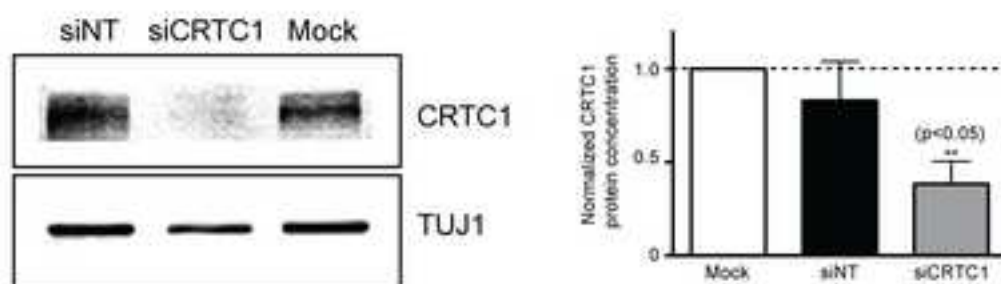

(B)

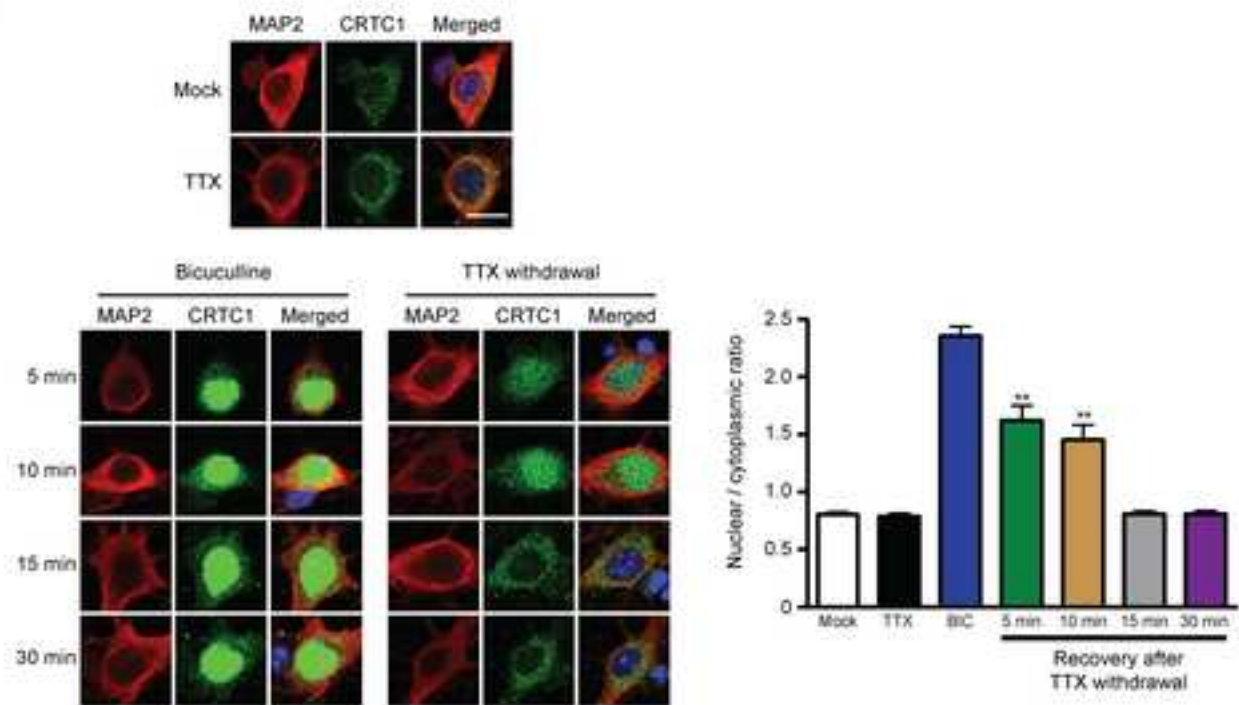

(C)

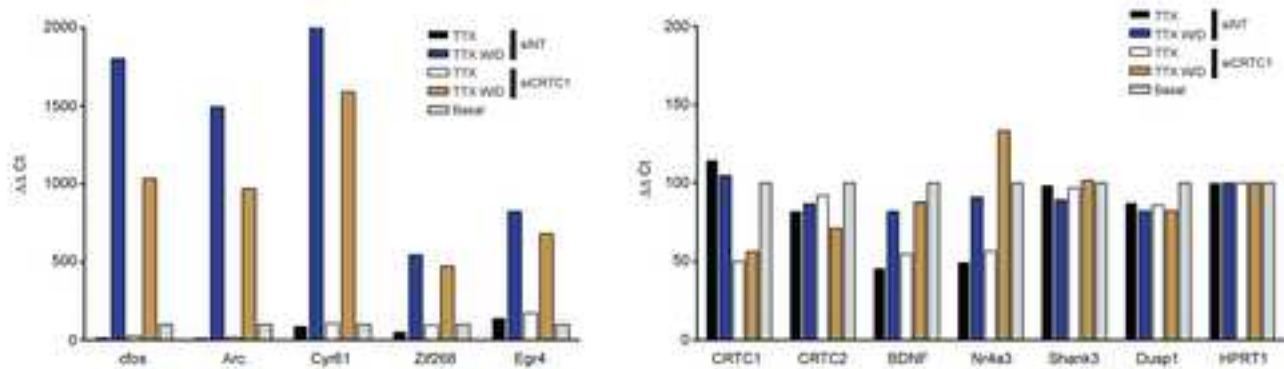

Figure S7

Supplement: NIHMS389686-supplement-02.pdf [file NIHMS389686-supplement-02.pdf]
